# Supplementary material
Source: PubMed Central journal article supplement (PMC7489414)
Supplement: jamainternmed-e205503-s001.pdf [file jamainternmed-e205503-s001.pdf]

1  
2  
3  
4  
5  
6  
7  
8  
9  
10  
11  
12  
13  
14  
15  
16

**Multicenter randomized controlled trial for rhG-GSF in the treatment of coronavirus disease 2019 (COVID-19)**

**PROTOCOL**  
**(COVID-19 study)**

Version 2.0 (Feb. 01, 2020)

Authors: COVID-19 Study Group

|    |                                                                   |            |
|----|-------------------------------------------------------------------|------------|
| 17 | <b>Contents</b>                                                   |            |
| 18 | <b>ABBREVIATIONS</b> .....                                        | <b>V</b>   |
| 19 | <b>ABSTRACT</b> .....                                             | <b>VII</b> |
| 20 | <b>AMENDMENT RECORDS</b> .....                                    | <b>X</b>   |
| 21 | <b>SIGNATURE FOR THE PRINCIPAL INVESTIGATOR (LEAD SITE)</b> ..... | <b>XI</b>  |
| 22 | <b>SIGNATURE PAGE OF THE STUDY PROTOCOL</b> .....                 | <b>XII</b> |
| 23 | <b>1 BACKGROUND AND OBJECTIVE</b> .....                           | <b>13</b>  |
| 24 | 1.1 STUDY BACKGROUND .....                                        | 13         |
| 25 | 1.2 OBJECTIVES .....                                              | 15         |
| 26 | 1.3 HYPOTHESIS .....                                              | 15         |
| 27 | <b>2 TRIAL DESIGN</b> .....                                       | <b>15</b>  |
| 28 | 2.1 MULTICENTER.....                                              | 16         |
| 29 | 2.2 ALLOCATION.....                                               | 16         |
| 30 | 2.3 RANDOMIZATION .....                                           | 16         |
| 31 | 2.4 SAMPLE SIZE .....                                             | 16         |
| 32 | 2.5 BLINDING .....                                                | 17         |
| 33 | 2.6 SUPERIORITY .....                                             | 17         |
| 34 | 2.7 FOLLOW-UP AND TIMING .....                                    | 17         |
| 35 | 2.8 FLOW CHART.....                                               | 17         |
| 36 | <b>3 STUDY PARTICIPANTS</b> .....                                 | <b>22</b>  |
| 37 | 3.1 DIAGNOSTIC CRITERIA .....                                     | 22         |
| 38 | 3.2 INCLUSION CRITERIA.....                                       | 22         |
| 39 | 3.3 CESSATION/WITHDRAWAL CRITERIA.....                            | 23         |
| 40 | 3.4 MANAGEMENT OF WITHDRAWAL AND CESSATION .....                  | 23         |
| 41 | 3.5 PARTICIPANT RECRUITMENT.....                                  | 23         |
| 42 | <b>4 TREATMENT INTERVENTIONS</b> .....                            | <b>23</b>  |
| 43 | 4.1 SOC.....                                                      | 23         |
| 44 | 4.2 G-CSF .....                                                   | 24         |
| 45 | 4.3 CONCOMITANT MEDICATIONS OR TREATMENT.....                     | 24         |
| 46 | <b>5 POTENTIAL RISKS AND BENEFITS</b> .....                       | <b>25</b>  |

|    |           |                                                       |           |
|----|-----------|-------------------------------------------------------|-----------|
| 47 | 5.1       | KNOWN POTENTIAL RISKS .....                           | 25        |
| 48 | 5.2       | KNOWN POTENTIAL BENEFITS .....                        | 25        |
| 49 | <b>6</b>  | <b>MANAGEMENT OF THE STUDY MEDICATIONS .....</b>      | <b>25</b> |
| 50 | 6.1       | STORAGE .....                                         | 25        |
| 51 | 6.2       | PREPARATION.....                                      | 25        |
| 52 | 6.3       | DOSE AND USAGE.....                                   | 26        |
| 53 | 6.4       | DURATION AND TIMING.....                              | 26        |
| 54 | 6.5       | COUNTING OF THE STUDY MEDICATIONS .....               | 26        |
| 55 | <b>7</b>  | <b>ENDPOINTS AND ASSESSMENT .....</b>                 | <b>26</b> |
| 56 | 7.1       | EFFICACY.....                                         | 26        |
| 57 | 7.2       | EFFICACY/SAFETY .....                                 | 27        |
| 58 | <b>8</b>  | <b>ADVERSE EVENTS.....</b>                            | <b>28</b> |
| 59 | 8.1       | DEFINITION.....                                       | 28        |
| 60 | 8.2       | RANGE.....                                            | 28        |
| 61 | 8.3       | OBSERVATION AND DOCUMENTATION OF ADVERSE EVENTS ..... | 28        |
| 62 | 8.4       | SEVERITY GRADING .....                                | 28        |
| 63 | 8.5       | CAUSALITY INFERENCE.....                              | 28        |
| 64 | 8.6       | TIME FRAME .....                                      | 29        |
| 65 | 8.7       | SERIOUS ADVERSE EVENTS .....                          | 29        |
| 66 | 8.8       | FOLLOW-UP .....                                       | 29        |
| 67 | <b>9</b>  | <b>DATA MANAGEMENT .....</b>                          | <b>30</b> |
| 68 | 9.1       | ENTRY .....                                           | 30        |
| 69 | 9.2       | DATA AUDIT AND CLEANING.....                          | 30        |
| 70 | 9.3       | DATA AUDIT MEETING .....                              | 30        |
| 71 | 9.4       | DATABASE LOCKING .....                                | 30        |
| 72 | 9.5       | STATISTICAL ANALYSIS.....                             | 31        |
| 73 | <b>10</b> | <b>ETHICS CONSIDERATIONS.....</b>                     | <b>32</b> |
| 74 | 10.1      | ETHICS COMMITTEE .....                                | 32        |
| 75 | 10.2      | INFORMED CONSENT FORMS.....                           | 33        |
| 76 | 10.3      | CONFIDENTIALITY .....                                 | 33        |
| 77 | <b>11</b> | <b>QUALITY CONTROL .....</b>                          | <b>34</b> |

|    |           |                                             |           |
|----|-----------|---------------------------------------------|-----------|
| 78 | 11.1      | STANDARDIZED OPERATING PROCEDURES.....      | 34        |
| 79 | 11.2      | LABORATORY QUALITY CONTROL .....            | 34        |
| 80 | 11.3      | CLINICAL AUDIT.....                         | 34        |
| 81 | 11.4      | INVESTIGATION.....                          | 34        |
| 82 | <b>12</b> | <b>ORGANIZATION AND IMPLEMENTATION.....</b> | <b>34</b> |
| 83 | <b>13</b> | <b>PARTICIPATING INVESTIGATORS.....</b>     | <b>34</b> |
| 84 | <b>14</b> | <b>REFERENCE .....</b>                      | <b>34</b> |
| 85 |           |                                             |           |
| 86 |           |                                             |           |

## Abbreviations

| <b>Abbreviation</b> | <b>Full name</b>                                        |
|---------------------|---------------------------------------------------------|
| COVID-19            | Coronavirus disease 2019                                |
| GM-CSF              | Granulocyte macrophage colony stimulating factor        |
| IL-6                | Interleukin-6                                           |
| SARS                | Severe acute respiratory syndrome                       |
| rhG-CSF             | recombinant human granulocyte colony stimulating factor |
| ICU                 | Intensive care unit                                     |
| RCT                 | Randomized controlled trial                             |
| PD-1                | Programmed death-1                                      |
| CRP                 | C reactive protein                                      |
| SARS-CoV-2          | Severe acute respiratory syndrome coronavirus-2         |
| RT-PCR              | Reverse transcription polymerase chain reaction         |
| TBNK                | T and B lymphocyte and NK cells                         |
| IL-2                | Interleukin-2                                           |
| IL-4                | Interleukin-4                                           |
| IL-10               | Interleukin-10                                          |
| TNF- $\alpha$       | Tumor necrosis factor- $\alpha$                         |
| IFN- $\gamma$       | $\Gamma$ -interferon                                    |
| LOCF                | Last observation carry forward                          |
| ITT                 | Intention-to-treat population                           |
| SS                  | Safety set                                              |
| SAE                 | Serious adverse event                                   |
| GCP                 | Good clinical practice                                  |
| HCT                 | hematocrit                                              |
| PaO <sub>2</sub>    | Partial pressure of oxygen                              |
| ADR                 | Adverse drug reaction                                   |
| AE                  | Adverse event                                           |
| ALP                 | Alkaline phosphatase                                    |

|      |                                           |
|------|-------------------------------------------|
| AST  | Aspartate aminotransferrase               |
| LDH  | Lactate dehydrogenase                     |
| ARDS | Acute respiratory distress syndrome       |
| QD   | Once daily                                |
| BUN  | Blood urea nitrogen                       |
| CDC  | Center for disease control and prevention |
| CFDA | Chinese food and drug administration      |
| ECMO | Extracorporeal membrane oxygenation       |
| IEC  | Independent ethics committee              |
| IP   | Investigational product                   |
| IRB  | Institutional review board                |
| PCR  | Polymerase chain reaction                 |
| SAP  | Statistical analysis plan                 |

88

89

## Abstract

|                            |                                                                                                                                                                                                                                                                                                                                                                                                                                                                                                                                                                                                                                                                                                                                                                                                                                                                                                                                                                                                                                                                                                                                                                                                                                                                                                                                                                                                                                                             |
|----------------------------|-------------------------------------------------------------------------------------------------------------------------------------------------------------------------------------------------------------------------------------------------------------------------------------------------------------------------------------------------------------------------------------------------------------------------------------------------------------------------------------------------------------------------------------------------------------------------------------------------------------------------------------------------------------------------------------------------------------------------------------------------------------------------------------------------------------------------------------------------------------------------------------------------------------------------------------------------------------------------------------------------------------------------------------------------------------------------------------------------------------------------------------------------------------------------------------------------------------------------------------------------------------------------------------------------------------------------------------------------------------------------------------------------------------------------------------------------------------|
| <b>Title</b>               | <b>Effects of Recombinant human Granulocyte Colony Stimulating Factor for Covid-19 with lymphopenia: A multicenter, randomized controlled trial</b>                                                                                                                                                                                                                                                                                                                                                                                                                                                                                                                                                                                                                                                                                                                                                                                                                                                                                                                                                                                                                                                                                                                                                                                                                                                                                                         |
| <b>PI</b>                  | Prof Nan-shan Zhong                                                                                                                                                                                                                                                                                                                                                                                                                                                                                                                                                                                                                                                                                                                                                                                                                                                                                                                                                                                                                                                                                                                                                                                                                                                                                                                                                                                                                                         |
| <b>Lead site</b>           | The First Affiliated Hospital of Guangzhou Medical University                                                                                                                                                                                                                                                                                                                                                                                                                                                                                                                                                                                                                                                                                                                                                                                                                                                                                                                                                                                                                                                                                                                                                                                                                                                                                                                                                                                               |
| <b>Participating sites</b> | The First Affiliated Hospital of Guangzhou Medical University, Guangzhou No. 8 People's Hospital, Wuhan Union Hospital, Wuhan Hankou Hospital                                                                                                                                                                                                                                                                                                                                                                                                                                                                                                                                                                                                                                                                                                                                                                                                                                                                                                                                                                                                                                                                                                                                                                                                                                                                                                               |
| <b>Objective</b>           | To determine the effectiveness and safety of recombinant human Granulocyte Colony Stimulating Factor for Covid-19 with lymphopenia                                                                                                                                                                                                                                                                                                                                                                                                                                                                                                                                                                                                                                                                                                                                                                                                                                                                                                                                                                                                                                                                                                                                                                                                                                                                                                                          |
| <b>Study design</b>        | Multicenter, randomized, standard-of-care controlled, superiority trial                                                                                                                                                                                                                                                                                                                                                                                                                                                                                                                                                                                                                                                                                                                                                                                                                                                                                                                                                                                                                                                                                                                                                                                                                                                                                                                                                                                     |
| <b>Study population</b>    | <p><b>Inclusion criteria</b></p> <ol style="list-style-type: none"> <li>1. Patients aged 18 years or greater who tested positive to reverse transcription polymerase-chain-reaction (RT-PCR) assay for SARS-CoV-2 in oropharyngeal sample, had pneumonia as confirmed by chest imaging; meeting the diagnostic criteria established by the <i>Protocol for the Diagnosis and Treatment of Coronavirus Disease (Trial version 5)</i> by the National Health Commission</li> <li>2. Peripheral blood leukocyte count being 1500 per cubic milliliters or less and peripheral blood lymphocyte (PBL) count of 800 per cubic milliliters or lower</li> </ol> <p><b>Exclusion criteria</b></p> <ol style="list-style-type: none"> <li>1. Critical illness requiring invasive ventilation, developed shock or other organ failure that requires admission to intensive care unit</li> <li>2. Any comorbidity (e.g., chronic obstructive pulmonary disease, hypertension, diabetes, coronary heart disease)</li> <li>3. Malignancy</li> <li>4. Breastfeeding and pregnant</li> <li>5. Severe mental disorders</li> <li>6. Unstable coronary heart diseases (angina pectoris, myocardial infarction, or severe stenosis of coronary arteries as indicated by angiography) within 6 months</li> <li>7. Cerebral infarction or hemorrhage within 6 months</li> <li>8. Intolerant or allergic to rhG-CSF</li> <li>9. Deemed ineligible by the investigators</li> </ol> |

| <b>Diagnostic criteria</b> | Meeting the diagnostic criteria established by the <i>Protocol for the Diagnosis and Treatment of Coronavirus Disease (Trial version 5)</i> by the National Health Commission                                                                                                                                                                                                                                                                                                                                                                                                                                                                                                                                                                                                                                                                                                                                                                                                                                                                                                                                                                                                                                                                                                                                                                                                                                                                                                                                                                                                                                                                                                                                                                                   |       |          |   |                                         |   |                                                         |   |                                                    |   |                                                |   |                                                                                                        |   |                                                                                               |   |       |
|----------------------------|-----------------------------------------------------------------------------------------------------------------------------------------------------------------------------------------------------------------------------------------------------------------------------------------------------------------------------------------------------------------------------------------------------------------------------------------------------------------------------------------------------------------------------------------------------------------------------------------------------------------------------------------------------------------------------------------------------------------------------------------------------------------------------------------------------------------------------------------------------------------------------------------------------------------------------------------------------------------------------------------------------------------------------------------------------------------------------------------------------------------------------------------------------------------------------------------------------------------------------------------------------------------------------------------------------------------------------------------------------------------------------------------------------------------------------------------------------------------------------------------------------------------------------------------------------------------------------------------------------------------------------------------------------------------------------------------------------------------------------------------------------------------|-------|----------|---|-----------------------------------------|---|---------------------------------------------------------|---|----------------------------------------------------|---|------------------------------------------------|---|--------------------------------------------------------------------------------------------------------|---|-----------------------------------------------------------------------------------------------|---|-------|
| <b>Sample size</b>         | Totally 200 cases (100 cases in each group)                                                                                                                                                                                                                                                                                                                                                                                                                                                                                                                                                                                                                                                                                                                                                                                                                                                                                                                                                                                                                                                                                                                                                                                                                                                                                                                                                                                                                                                                                                                                                                                                                                                                                                                     |       |          |   |                                         |   |                                                         |   |                                                    |   |                                                |   |                                                                                                        |   |                                                                                               |   |       |
| <b>Interventions</b>       | <p><b>Treatment group:</b> Standard-of-care (SOC) alone or plus rhG-CSF (5 µg/kg subcutaneously once daily from days 0 to 2)</p> <p><b>Control group:</b> SOC</p> <p><b>Standard-of-care treatment:</b> Based on the <i>Protocol for the Diagnosis and Treatment of Coronavirus Disease (Trial version 5)</i> by the National Health Commission, SOC comprised resting, supportive treatment (supplemental oxygen, non-invasive ventilation, or intravenous antibiotics), supplementation of nutrition and energy, water and electrolyte equilibrium, and maintenance of homeostasis</p>                                                                                                                                                                                                                                                                                                                                                                                                                                                                                                                                                                                                                                                                                                                                                                                                                                                                                                                                                                                                                                                                                                                                                                        |       |          |   |                                         |   |                                                         |   |                                                    |   |                                                |   |                                                                                                        |   |                                                                                               |   |       |
| <b>Endpoints</b>           | <p><b>Primary endpoint</b></p> <p>The time to clinical improvement (endorsed by the World Health Organization R&amp;D Blueprint expert group) within 21 days - the duration from randomization to the improvement of at least one point on a seven-category ordinal scale or discharge from hospital, whichever occurred first</p> <p><b>The 7-category scale</b></p> <table border="1" data-bbox="421 1294 1442 1800"> <thead> <tr> <th data-bbox="421 1294 619 1348">Score</th> <th data-bbox="619 1294 1442 1348">Criteria</th> </tr> </thead> <tbody> <tr> <td data-bbox="421 1348 619 1402">1</td> <td data-bbox="619 1348 1442 1402">Non-hospitalized with normal activities</td> </tr> <tr> <td data-bbox="421 1402 619 1456">2</td> <td data-bbox="619 1402 1442 1456">Non-hospitalized but unable to resume normal activities</td> </tr> <tr> <td data-bbox="421 1456 619 1509">3</td> <td data-bbox="619 1456 1442 1509">Hospitalized but not requiring supplemental oxygen</td> </tr> <tr> <td data-bbox="421 1509 619 1563">4</td> <td data-bbox="619 1509 1442 1563">Hospitalized and requiring supplemental oxygen</td> </tr> <tr> <td data-bbox="421 1563 619 1662">5</td> <td data-bbox="619 1563 1442 1662">Hospitalized and requiring nasal high-flow oxygen therapy, noninvasive mechanical ventilation, or both</td> </tr> <tr> <td data-bbox="421 1662 619 1747">6</td> <td data-bbox="619 1662 1442 1747">Hospitalized and requiring extracorporeal membrane oxygenation, invasive ventilation, or both</td> </tr> <tr> <td data-bbox="421 1747 619 1800">7</td> <td data-bbox="619 1747 1442 1800">Death</td> </tr> </tbody> </table> <p><b>Secondary endpoints</b></p> <p>Lymphocyte count at each visit</p> <p>Mortality at day 21</p> | Score | Criteria | 1 | Non-hospitalized with normal activities | 2 | Non-hospitalized but unable to resume normal activities | 3 | Hospitalized but not requiring supplemental oxygen | 4 | Hospitalized and requiring supplemental oxygen | 5 | Hospitalized and requiring nasal high-flow oxygen therapy, noninvasive mechanical ventilation, or both | 6 | Hospitalized and requiring extracorporeal membrane oxygenation, invasive ventilation, or both | 7 | Death |
| Score                      | Criteria                                                                                                                                                                                                                                                                                                                                                                                                                                                                                                                                                                                                                                                                                                                                                                                                                                                                                                                                                                                                                                                                                                                                                                                                                                                                                                                                                                                                                                                                                                                                                                                                                                                                                                                                                        |       |          |   |                                         |   |                                                         |   |                                                    |   |                                                |   |                                                                                                        |   |                                                                                               |   |       |
| 1                          | Non-hospitalized with normal activities                                                                                                                                                                                                                                                                                                                                                                                                                                                                                                                                                                                                                                                                                                                                                                                                                                                                                                                                                                                                                                                                                                                                                                                                                                                                                                                                                                                                                                                                                                                                                                                                                                                                                                                         |       |          |   |                                         |   |                                                         |   |                                                    |   |                                                |   |                                                                                                        |   |                                                                                               |   |       |
| 2                          | Non-hospitalized but unable to resume normal activities                                                                                                                                                                                                                                                                                                                                                                                                                                                                                                                                                                                                                                                                                                                                                                                                                                                                                                                                                                                                                                                                                                                                                                                                                                                                                                                                                                                                                                                                                                                                                                                                                                                                                                         |       |          |   |                                         |   |                                                         |   |                                                    |   |                                                |   |                                                                                                        |   |                                                                                               |   |       |
| 3                          | Hospitalized but not requiring supplemental oxygen                                                                                                                                                                                                                                                                                                                                                                                                                                                                                                                                                                                                                                                                                                                                                                                                                                                                                                                                                                                                                                                                                                                                                                                                                                                                                                                                                                                                                                                                                                                                                                                                                                                                                                              |       |          |   |                                         |   |                                                         |   |                                                    |   |                                                |   |                                                                                                        |   |                                                                                               |   |       |
| 4                          | Hospitalized and requiring supplemental oxygen                                                                                                                                                                                                                                                                                                                                                                                                                                                                                                                                                                                                                                                                                                                                                                                                                                                                                                                                                                                                                                                                                                                                                                                                                                                                                                                                                                                                                                                                                                                                                                                                                                                                                                                  |       |          |   |                                         |   |                                                         |   |                                                    |   |                                                |   |                                                                                                        |   |                                                                                               |   |       |
| 5                          | Hospitalized and requiring nasal high-flow oxygen therapy, noninvasive mechanical ventilation, or both                                                                                                                                                                                                                                                                                                                                                                                                                                                                                                                                                                                                                                                                                                                                                                                                                                                                                                                                                                                                                                                                                                                                                                                                                                                                                                                                                                                                                                                                                                                                                                                                                                                          |       |          |   |                                         |   |                                                         |   |                                                    |   |                                                |   |                                                                                                        |   |                                                                                               |   |       |
| 6                          | Hospitalized and requiring extracorporeal membrane oxygenation, invasive ventilation, or both                                                                                                                                                                                                                                                                                                                                                                                                                                                                                                                                                                                                                                                                                                                                                                                                                                                                                                                                                                                                                                                                                                                                                                                                                                                                                                                                                                                                                                                                                                                                                                                                                                                                   |       |          |   |                                         |   |                                                         |   |                                                    |   |                                                |   |                                                                                                        |   |                                                                                               |   |       |
| 7                          | Death                                                                                                                                                                                                                                                                                                                                                                                                                                                                                                                                                                                                                                                                                                                                                                                                                                                                                                                                                                                                                                                                                                                                                                                                                                                                                                                                                                                                                                                                                                                                                                                                                                                                                                                                                           |       |          |   |                                         |   |                                                         |   |                                                    |   |                                                |   |                                                                                                        |   |                                                                                               |   |       |



|                             |                                                                                                                                                                                                                                                                                                                                                                                                                                                                                                                                                                                                                                                                  |
|-----------------------------|------------------------------------------------------------------------------------------------------------------------------------------------------------------------------------------------------------------------------------------------------------------------------------------------------------------------------------------------------------------------------------------------------------------------------------------------------------------------------------------------------------------------------------------------------------------------------------------------------------------------------------------------------------------|
|                             | <p>The proportion of patients progressing to critical conditions (acute respiratory distress syndrome, sepsis or septic shock) at day 21</p> <p>Viral loads and detection rate at each visit</p> <p>The duration of oxygen therapy</p> <p>Duration of hospitalization</p>                                                                                                                                                                                                                                                                                                                                                                                        |
| <b>Safety</b>               | Adverse events                                                                                                                                                                                                                                                                                                                                                                                                                                                                                                                                                                                                                                                   |
| <b>Follow-up</b>            | From enrollment to day 21 or discharge from hospital after randomization                                                                                                                                                                                                                                                                                                                                                                                                                                                                                                                                                                                         |
| <b>Superiority</b>          | The improvement of at least one point on a seven-category ordinal scale or discharge from hospital would be shorter in the treatment group                                                                                                                                                                                                                                                                                                                                                                                                                                                                                                                       |
| <b>Statistical analysis</b> | <p><b>Hypothesis</b></p> <p>H0: No difference in the duration from enrollment to clinical improvement between the two groups</p> <p>H1: Shorter duration from enrollment to clinical improvement in treatment group</p> <p><b>Main outcomes</b></p> <p>Kaplan-Meier plot will be applied, with Gray's test for comparison of the between-group differences; Fine and Gray proportion sub-distribution hazards model will be applied, along with the HR and the 95%CI. Right-censoring of data at day 21 will be conducted in case of a failure to reach to the clinical improvement. Death events before day 21 will be treated as the competing risk event.</p> |
| <b>Anticipated progress</b> | 2020.02.03~2020.04.10                                                                                                                                                                                                                                                                                                                                                                                                                                                                                                                                                                                                                                            |

**Amendment records**

| <b>Date of revision</b> | <b>Version</b> | <b>Chapter</b> | <b>Main contents</b>                                                                                                                                                                                                                                |
|-------------------------|----------------|----------------|-----------------------------------------------------------------------------------------------------------------------------------------------------------------------------------------------------------------------------------------------------|
| February 15             | V2.0           | 2.1; 2.4       | The First Affiliated Hospital of Guangzhou Medical University was not in the list because no patient was included. We have further adjusted the sample size to 40 per group for the patients to be recruited from Guangzhou No. 8 People's Hospital |
|                         |                |                |                                                                                                                                                                                                                                                     |
|                         |                |                |                                                                                                                                                                                                                                                     |
|                         |                |                |                                                                                                                                                                                                                                                     |

96

97

## Signature for the principal investigator (lead site)

98

99 I have reviewed and confirmed the study protocol, and will fulfill my responsibilities based on  
100 the Chinese laws, Declaration of Helsinki, the Good Clinical Practice and the study protocol. I  
101 consent to dispatch the data audit managers to ensure the reliability, accuracy and completeness of  
102 the data and the timely entry to warrant high quality of the clinical trial findings. I declare that the  
103 investigators will maintain the confidentiality of the personal information and other relevant data. I  
104 will implement necessary measures to protect the safety, rights and responsibility of the study  
105 participants. I will implement the updated protocol after notifying the participating sites to amend  
106 the study protocol and obtaining ethics committee approval.

107

108 **Lead site:** The First Affiliated Hospital of Guangzhou Medical University

109

110 **PI:** Nan-shan Zhong (Print) \_\_\_\_\_ (Signature)

111

112 **Date:** 2020-2-18 **Phone:** \_\_\_\_\_

113 **Address:** 151 Yanjiang Road, Guangzhou **Postal code:** 510120

114

115

116  
117  
118  
119  
120  
121  
122  
123  
124  
125  
126  
127  
128  
129  
130  
131  
132  
133  
134  
135  
136  
137  
138  
139  
140  
141  
142  
143  
144  
145

## Signature page of the study protocol

I will take the responsibility of the study investigator by directly guiding the conduct of the clinical trial based on the Good Clinical Practice. Having received the investigator's protocol, I have been aware of and reviewed the research background before initiating the clinical. I consent to take my responsibilities based on the Chinese laws, Declaration of Helsinki, the Good Clinical Practice and the study protocol. I will not implement the updated protocol after notifying the participating sites to amend the study protocol and obtaining ethics committee approval unless the circumstance when the safety, rights and responsibility of the study participants should be protected. I will medical decisions related to the clinical practice to ensure that all study participants who have developed adverse events during the trial to receive timely management, and document and report all these adverse events based on the national regulations.

I will ensure the reliability, accuracy and completeness of the data and the timely entry to warrant high quality of the clinical trial findings. I will cooperate with the monitoring or audit which is executed by the data monitor or audit managers dispatched by the sponsor. I declare that I will maintain the confidentiality of the personal information and other relevant data. I consent to disclose my names, occupation, and the expenditure associated with the clinical trial, and prohibit any commercial or economic behaviors related to the clinical trial to the sponsor. I consent to submit the research findings for drug registry and publication.

**Lead site:** The First Affiliated Hospital of Guangzhou Medical University

**PI:** Nan-shan Zhong (Print) \_\_\_\_\_ (Signature)

**Date:** 2020-2-18      **Phone:** \_\_\_\_\_

**Address:** 151 Yanjiang Road, Guangzhou      **Postal code:** 510120

# Clinical trial protocol

146

## 147 **1 Background and objective**

### 148 **1.1 Study background**

149 Coronavirus disease 2019 (COVID-19) has masqueraded globally. The incubation period of  
150 Covid-19 might be longer than SARS and is highly contagious. Some of the patients might  
151 readily progress to critical illnesses or death. In a study of 138 patients with Covid-19 recently  
152 published in JAMA [1], the dynamic changes in peripheral blood leukocyte and lymphocyte  
153 count correlated significantly with the prognosis of patients with Covid-19. The leukocyte  
154 count did not exceed the upper limit of normal from onset of disease to day 19 among the  
155 survivors, whereas the leukocyte count rapidly increased since day 7 and exceeded the upper  
156 limit of normal since day 9 among the non-survivors. It was also reported that lymphopenia  
157 existed in a considerable proportion of survivors and non-survivors with Covid-19. However,  
158 there was a more dramatic decrease in the lymphocyte count among the non-survivors who  
159 had both a lower level at baseline but also sustained decrease throughout the course of the  
160 disease. Moreover, the peripheral blood lymphocyte count fell to an extremely low level since  
161 day 5 after the onset of disease (remarkable reductions) in non-survivors whereas the decrease  
162 in lymphocyte count was relatively minor among survivors (only reaching to the nadir at day  
163 9).

164 The mechanisms underlying these changes in the leukocyte and lymphocyte count  
165 among patients with Covid-19 remain unclear. A study suggested that the inflammatory  
166 cytokine storm was the main contributor of the progression to critical illness among patients  
167 with Covid-19 [2]. After the infection with SARS-CoV-2, the activated T cells and  
168 mononuclear cells will precipitate to the inflammatory cytokine storm via the signaling  
169 pathways of granulocyte macrophage colony stimulating factor and interleukin-6 that led to  
170 lung injury [3]. Therefore, proactive treatment should be initiated once the cytokine storm and  
171 SIRS occur.

172 There have been a number of treatments for critical illness of Covid-19 [4]: 1.  
173 Treatments against shock (for maintenance of the vital signs): infusion to increase the blood  
174 volume, use of vasopressors, mechanical ventilation if indicated to protect the organ function;  
175 2. Supportive and symptomatic treatment (revitalization): infusion, and maintenance of the  
176 water and electrolyte equilibrium, energy and nutritional support; 3. Suppressing excessive

177 activation of the immune cells and production of the cytokines (for promoting rehabilitation):  
178 Adequate use of corticosteroids, non-steroidal anti-inflammatory drugs or free radical  
179 scavenger (high-dose vitamin C and E); 4. Antibodies to neutralize the cytokine storm  
180 (precision treatment): Monoclonal antibodies that target specially at the corresponding  
181 cytokines to prevent from further progression or death.

182 Based on these understandings, there have been multiple randomized controlled trials  
183 that are on the way. Interleukin-6 receptor blocker tocilizumab (recombinant humanized  
184 interleukin-6 monoclonal antibody) has been proposed to antagonize the inflammatory  
185 cytokine storm. There has also been a phase III trial with tocilizumab in patients with  
186 Covid-19. Anti-PD-1 medications have also been proposed to activate the immune pathways  
187 for the treatment of Covid-19 (ChiCTR2000029806). Regardless, a precise evaluation should  
188 be needed before initiating the therapies. Interleukin-6 inhibitors should be applied in case of  
189 the excessive immune responses and anti-PD-1 agents should be applied in case of the  
190 suppressed immune function. However, the clinical application of these drugs would be  
191 challenging because there could be overlap in the states.

192 We think that the progression of disease cannot be totally explained by the cytokine  
193 storm when analyzed based on the dynamic changes in peripheral blood leukocyte count.  
194 Leukopenia along with lymphopenia also existed in a number of patients with mild Covid-19.  
195 However, no remarkable signs of cytokine storms were identified upon discharge from the  
196 hospital. We therefore hypothesized that the SARS-CoV-2 might have predisposed to the  
197 marked reduction in the lymphocyte count.

198 Upon literature review [5.6], along with the mechanistic investigations published in 2003,  
199 we think that the viral infections in the lymph tissues resulted in suppressed immunity that led  
200 to aberrant immune responses (lymphopenia, lung injury). The cytokine storm would  
201 subsequently predispose to further aggravation of the lung injury, resulting in organ  
202 dysfunction or even death. Therefore, some pilot studies have attempted to manage SARS  
203 with the recombinant human granulocyte colony stimulating factor (rhG-CSF), with  
204 remarkable therapeutic outcomes -- markedly increased lymphocyte count after treatment.  
205 Notably, no major adverse impacts (aggravation of pneumonia) or aggravation of  
206 inflammatory responses were identified. The possible mechanisms might be that rhG-CSF led  
207 to decreased responsiveness to the viral antigen and up-regulated immunity and ameliorated

208 inflammatory responses.

209 Based on the homology of SARS-CoV and SARS-CoV-2 as well as the successful  
210 treatment experience during the pilot investigations, we have planned for the investigation of  
211 the effects of rhG-CSF in patients with Covid-19. For instance, we have administered  
212 rhG-CSF in two patients with peripheral blood leukocyte count being  $<2.5 \times 10^9/L$  and  
213 lymphocyte count  $< 0.8 \times 10^9/L$ . Injection of rhG-CSF (5ug/kg) for a single dose led to a  
214 marked increase in the peripheral blood leukocyte and lymphocyte count. Intriguingly, the  
215 lymphocyte count sustained despite progressively declined leukocyte count thereafter.  
216 Meanwhile, we also noted progressively decrease temperature at days 2-3 and clinical  
217 improvement. The patients were finally discharged home after achieving viral assay  
218 conversion. We have also attempted to manage another six patients with normal leukocyte  
219 count but decreased lymphocyte count, and achieved similar clinical and laboratory test  
220 findings. None of the eight patients had documented aggravation of pneumonia.

221 Therefore, we think that it would be justified to conduct an open-label, multicenter  
222 clinical trial of rhG-CSF in patients with Covid-19 who had lymphopenia. Our findings will  
223 provide a solid basis for further exploration of the mode of action of rhG-CSF in patients with  
224 Covid-19.

225

## 226 **1.2 Objectives**

227 Primary objective: To determine the effectiveness of recombinant human Granulocyte  
228 Colony Stimulating Factor for Covid-19 with lymphopenia

229 Secondary objective: To determine the safety of recombinant human Granulocyte Colony  
230 Stimulating Factor for Covid-19 with lymphopenia

## 231 **1.3 Hypothesis**

232 H0: No difference in the duration from enrollment to clinical improvement between the  
233 two groups

234 H1: Shorter duration from enrollment to clinical improvement in treatment group

## 235 **2 Trial design**

236 Multicenter, randomized, standard-of-care controlled, superiority trial

237 **2.1 Multicenter**

238 The First Affiliated Hospital of Guangzhou Medical University, Guangzhou No. 8  
239 People’s Hospital, Wuhan Union Hospital, Wuhan Hankou Hospital

240 **2.2 Allocation**

241 **Treatment group:** Standard-of-care (SOC) alone or plus rhG-CSF (5 µg/kg subcutaneously  
242 once daily from days 0 to 2)

243 **Control group:** SOC

244 **2.3 Randomization**

245 Because the decision whether or not to initiate oxygen therapy (nasal cannula or mask, or  
246 high-flow oxygen, non-invasive ventilation) will be based on patient’s disease severity, we  
247 will stratify the patients to balance the distribution of oxygen therapy between the two groups  
248 (non-invasive, invasive ventilation or ECMO). A statistician blinded to trial allocation will be  
249 responsible for generating the permuted block (four patients per block) randomization  
250 sequence by using SAS software (version 9.4, SAS Institute, USA)

251 **2.4 Sample size**

252 No report was available to provide the basis for sample size estimation. Assuming a two-sided  
253 significance level of  $\alpha=0.05$ , the median duration of 14 days in SOC group and 70% of  
254 patients would achieve clinical improvement, 192 patients would be needed to provide a  
255 power of 90% to detect a 6-day difference in the median time to clinical improvement. In light  
256 of the relatively low drop-out rate, we consider that a total of 200 cases (100 per group) would  
257 be sufficient to power the analysis.

258 Table 1. Study participant number assignment

| Participating sites                                           | Number | Treatment group | Control group |
|---------------------------------------------------------------|--------|-----------------|---------------|
| The First Affiliated Hospital of Guangzhou Medical University | 1      | 0               | 0             |
| Guangzhou No. 8 People’s Hospital                             | 2      | 40              | 40            |
| Wuhan Union Hospital                                          | 3      | 10              | 10            |
| Wuhan Hankou Hospital                                         | 4      | 50              | 50            |



259

260 **2.5 Blinding**

261 We have adopted an open-label design.

262 **2.6 Superiority**

263 The improvement of at least one point on a seven-category ordinal scale or discharge  
264 from hospital would be shorter in the treatment group

265 **2.7 Follow-up and timing**

266 We will recruit hospitalized patients for continuous monitoring until discharge from  
267 hospital or the end-of-treatment.

268 **2.8 Flow chart**

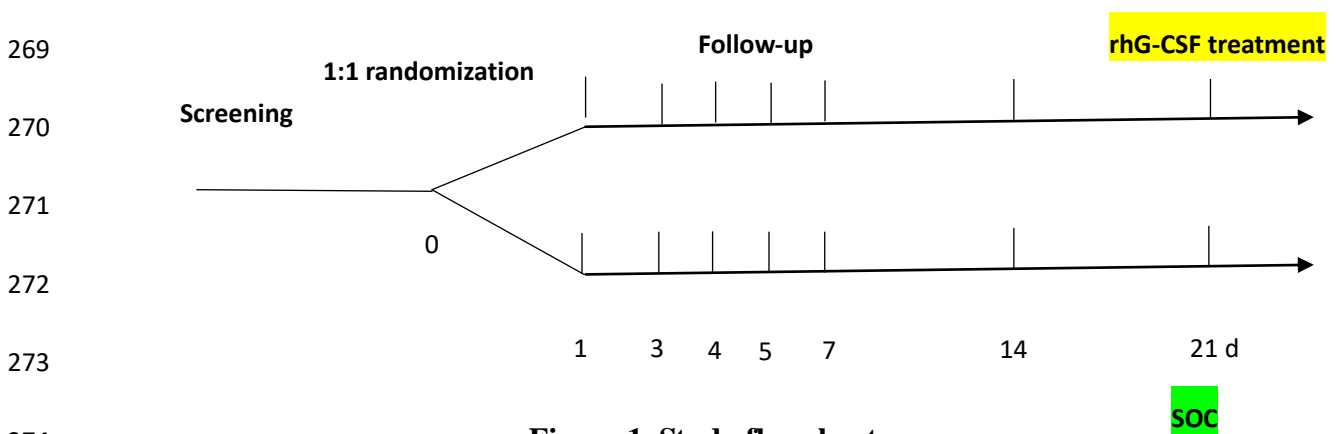

274 **Figure 1. Study flowchart**

275 **1. Baseline and enrollment**

276 **Day 0**

277 **History:** name, sex, time of onset, onset of fever, previous use of medications and the  
278 duration

279 **Vital signs:** temperature, heart rate, respiratory rate, blood pressure, oxygen saturation

280 **Symptoms and treatment:** fever, cough, dyspnea, oxygen therapy (nasal cannula,  
281 transnasal humidified high-flow oxygenation, non-invasive, invasive ventilation, ECMO)

282 **Laboratory assessment:** blood routine test, liver enzymes (AST, ALT and LDH); cardiac  
283 enzymes (CKMB, etc.), renal function (including blood creatinine), blood gas analysis,  
284 PCT, CRP, lymphocyte subset (CD4+T, CD8+T and NK cells), oropharyngeal swab  
285 SARS-CoV-2 assay for Orflab segment, chest imaging

286 **7-category scale assessed daily**

## 287 2. Follow-up

288 Patients will be followed-up until death or 21 days, whichever occurs first. The survival  
289 status, duration of hospitalization, date of death and cause of death (if applicable) will be  
290 recorded.

### 291 Contents

- 292 ● 7-category scale daily assessment
- 293 ● Current symptoms or overall well-being
- 294 ● Vital signs
- 295 ● Supportive treatment (nasal cannula, transnasal high-flow humidification,  
296 non-invasive, invasive ventilation, and ECMO)
- 297 ● Study medication
- 298 ● Laboratory assessment (if indicated), blood routine test, liver enzymes (AST, ALT and  
299 LDH); cardiac enzymes (CKMB, etc.), renal function (including blood creatinine),  
300 blood gas analysis, PCT, CRP, lymphocyte subset (CD4+T, CD8+T and NK cells),  
301 oropharyngeal swab SARS-CoV-2 assay for Orflab segment
- 302 ● Adverse events or serious adverse events
- 303 ● Discharge/death/any outcomes

### 304 3. Final visits

305 In our study, the primary endpoint is the time to clinical improvement (endorsed by the World  
306 Health Organization R&D Blueprint expert group) within 21 days - the duration from  
307 randomization to the improvement of at least one point on a seven-category ordinal scale or  
308 discharge from hospital, whichever occurs first. Therefore, follow-up visit at day 21 would be  
309 crucial to data collection. Patients will be discharged if meeting the criteria defined by the  
310 *Protocol for the Diagnosis and Treatment of Coronavirus Disease (Trial version 5)*.  
311 Telephone visits will be adopted for patients discharged home.

### 312 4. Premature withdrawal

- 313 ● Drug-related serious adverse events
- 314 ● Discharge

- 315 ● Death
- 316 ● Patients requesting withdrawal
- 317 ● Cessation of study medications for safety reasons
- 318

## Study flow

|                                                                          | Screening | Baseline | Treatment |       |       |       |        |        |        |
|--------------------------------------------------------------------------|-----------|----------|-----------|-------|-------|-------|--------|--------|--------|
| Visit                                                                    | V0        | V1       | V2        | V3    | V4    | V5    | V6     | V7     | V8     |
| Time point                                                               | Day 0     | Day 1    | Day 3     | Day 4 | Day 5 | Day 7 | Day 10 | Day 14 | Day 21 |
| History taking                                                           |           |          |           |       |       |       |        |        |        |
| Informed consent                                                         | •         |          |           |       |       |       |        |        |        |
| History acquisition                                                      | •         |          |           |       |       |       |        |        |        |
| Demographics                                                             | •         |          |           |       |       |       |        |        |        |
| Ascertainment of inclusion                                               | •         | •        |           |       |       |       |        |        |        |
| Efficacy and safety assessment                                           |           |          |           |       |       |       |        |        |        |
| Symptoms and treatment: fever, cough and dyspnea, oxygen therapy         | •         | •        | •         | •     | •     | •     | •      | •      | •      |
| Vital signs (temperature, heart rate, blood pressure, oxygen saturation) | •         | •        | •         | •     | •     | •     | •      | •      | •      |
| Complications (ARDS, septic shock, bacteremia)                           | •         | •        | •         | •     | •     | •     | •      | •      | •      |
| 7-category scale*                                                        | •         | •        | •         | •     | •     | •     | •      | •      | •      |
| Chest imaging                                                            | •         |          |           |       |       |       |        |        | •      |
| Laboratory assessment                                                    |           |          |           |       |       |       |        |        |        |
| Whole blood cell count                                                   | •         | •        | •         |       | •     | •     | •      | •      | •      |
| Liver function, renal function and cardiac enzymology#                   | •         |          |           |       |       | •     |        |        | •      |
| Arterial blood gas analysis                                              | •         |          |           |       |       |       |        |        |        |
| PCT                                                                      | •         |          |           |       |       |       |        |        |        |
| CRP                                                                      | •         |          |           |       |       |       |        |        |        |

|                                                                          |   |   |   |   |   |   |   |   |   |
|--------------------------------------------------------------------------|---|---|---|---|---|---|---|---|---|
| T lymphocyte subset&                                                     | • | • | • |   | • | • | • | • | • |
| Common pathogens                                                         | • |   |   |   |   |   |   |   |   |
| Oropharyngeal swab                                                       | • | • |   | • |   | • | • | • | • |
| Lower respiratory tract specimens (sputum, tracheal aspirates, and BALF) | • | • |   | • |   | • | • | • | • |
| Trial medications                                                        |   |   |   |   |   |   |   |   |   |
| Study medications                                                        |   | • | • | • |   |   |   |   |   |
| Concomitant medications                                                  |   | • | • | • | • | • | • | • | • |
| Concomitant treatment                                                    |   | • | • | • | • | • | • | • | • |
| Adverse events                                                           |   | • | • | • | • | • | • | • | • |

320 21-day follow-up consists of daily assessment during hospitalization; telephone visits will be scheduled if discharged home

321 \*7-category scale to be evaluated at 8-9 am each day

322 # liver function assessment: AST, ALT and LDH; cardiac enzymes (CKMB, etc.), renal function (including blood creatinine)

323 & Lymphocyte subsets and enumeration: CD4+T, CD8+T lymphocytes; NK cells and percentages

---

324 **3 Study participants**

325 **3.1 Diagnostic criteria**

326 Based on the *Protocol for the Diagnosis and Treatment of Coronavirus Disease (Trial*  
327 *version 5)* by the National Health Commission

328 **3.2 Inclusion criteria**

329 1. Patients aged 18 years or greater who tested positive to reverse transcription  
330 polymerase-chain-reaction (RT-PCR) assay for SARS-CoV-2 in oropharyngeal sample, had  
331 pneumonia as confirmed by chest imaging; meeting the diagnostic criteria established by the  
332 *Protocol for the Diagnosis and Treatment of Coronavirus Disease (Trial version 5)* by the  
333 National Health Commission

334 2. Peripheral blood leukocyte count being 1500 per cubic milliliters or less and peripheral  
335 blood lymphocyte (PBL) count of 800 per cubic milliliters or lower

336 **3.3 Exclusion criteria**

337 1. Critical illness requiring invasive ventilation, developed shock or other organ failure  
338 that requires admission to intensive care unit

339 2. Any comorbidity (e.g., chronic obstructive pulmonary disease, hypertension, diabetes,  
340 coronary heart disease)

341 3. Malignancy

342 4. Breastfeeding and pregnant

343 5. Severe mental disorders

344 6. Unstable coronary heart diseases (angina pectoris, myocardial infarction, or severe  
345 stenosis of coronary arteries as indicated by angiography) within 6 months

346 7. Cerebral infarction or hemorrhage within 6 months

347 8. Intolerant or allergic to rhG-CSF

348 9. Deemed ineligible by the investigators

349 ***Safety outcomes***

350 Safety outcomes will include the following:

351 adverse events;

352 serious adverse events;

353 premature discontinuation of treatment.

354

---

### 3.3 Cessation/withdrawal criteria

1. Having serious and intolerable adverse events, and deemed directly by the study investigators (i.e. serious allergic reactions needing cessation of the study medications)
2. Loss of data affecting the assessment of the primary endpoints
3. Pregnant during the study
4. Patients requesting withdrawal。

Patients who had adverse events should be follow-up until the complete resolution of the adverse events and deemed stabilized by the investigators. Recordings should also be made on the CRF.

### 3.4 Management of withdrawal and cessation

Patients will have the rights to withdraw from the study at any time and will not subject to discrimination. The reasons leading to premature withdrawal will be recorded on the CRF. Follow-up visits will be scheduled for all possible means (including the day 21 visits).

### 3.5 Participant recruitment

Within Guangzhou No. 8 People's Hospital, Wuhan Union Hospital, Wuhan Hankou Hospital

## 4 Treatment interventions

**Treatment group:** Standard-of-care (SOC) alone or plus rhG-CSF (5 µg/kg subcutaneously once daily from days 0 to 2)

**Control group:** SOC

**Standard-of-care treatment:** Based on the *Protocol for the Diagnosis and Treatment of Coronavirus Disease (Trial version 5)* by the National Health Commission, SOC comprised resting, supportive treatment (supplemental oxygen, non-invasive ventilation, or intravenous antibiotics), supplementation of nutrition and energy, water and electrolyte equilibrium, and maintenance of homeostasis

### 4.1 SOC

Based on the *Protocol for the Diagnosis and Treatment of Coronavirus Disease (Trial*

---

384 *version 5*) by the National Health Commission

385 1) Lying on bed, strengthening supportive therapy, energy supplementation; maintaining  
386 water and electrolyte equilibrium, maintaining homeostasis; closely monitoring vital  
387 signs and digital oxygen saturation

388 2) Monitor blood routine, urine routine test, CRP, biochemical parameters (liver, cardiac  
389 and renal function), coagulation, arterial blood gas analysis

390 3) Effective oxygen therapy via nasal cannula, facial masks or high-flow oxygen therapy

391 4) Antiviral treatment if indicated

392 5) Antibiotics if indicated

## 393 **4.2 G-CSF**

394 rhG-CSF injections

395 1) Main components: rhG-CSF, which is derived from the human cystic carcinoma cells  
396 and contains 175 amino acid residues (C845H1339N223O243S9; molecular weight  
397 18,748.88)

398 2) Adjuvant: polysorbate 80, mannitol, acetic acid, sodium hydroxide, water for injection

399 3) Size: 0.3 ml: 75 µg; 0.6 ml: 150 µg; 1.2 ml: 300µg

400 4) Storage: 2°C-10°C, avoid frozen

401 5) Manufacturer: Kyowa Hakko Kirin China Pharmaceutical Co. Ltd.

## 402 **4.3 Concomitant medications or treatment**

### 403 **4.3.1 Medications with indication**

404 Antiviral drugs, antibiotics, corticosteroids, paracetamol, albumin, anti-hypertensive drugs,  
405 glucose-lowering drugs, inotropic drugs or vasopressors (if indicated)

### 406 **4.3.2 Medications with caution**

407 Di-yu-sheng-bai tablets, berberin hydrochloride tablets, Sheng-bai granules, Sheng-bai oral  
408 solution, Sheng-bai Rehabilitation oral solutions

### 409 **4.3.3 Rescue medications**

410 Adrenaline, atropine, antihistamines, corticosteroids, bronchodilators

### 411 **4.3.4 Medications with contraindications**

412 Drugs with antiviral effects (i.e., arbidol, lopinavir/ritonavir, chloroquine, hydrochloroquine)



---

### 413 **4.3.5 Concomitant medications and management of treatment**

414 1) Medications that should be maintained must be recorded in the CRF. The name, dose,  
415 and timing should be documented for all concomitant medications.

416 2) Concomitant medications should be maintained based on the instructions of the  
417 investigations during the trial.

418 3) Other necessary medications would be allowed if clinically indicated despite the  
419 symptoms are not indicated. However, this should also be documented in the CRF.

## 420 **5 Potential risks and benefits**

### 421 **5.1 Known potential risks**

422 Serious adverse events such as shock, interstitial pneumonia, acute respiratory distress  
423 syndrome, an increase in the naive blood cells; other adverse events might include skin rashes,  
424 flushes (incidence <1%), neutrophil infiltrating macular, Sweet syndrome (incidence  
425 unknown), osteodynia (incidence 1%-5%), back pain, chest pain, arthralgia (incidence <1%),  
426 nausea and vomiting (incidence <1%), abnormal liver function, increased GOT and GPT  
427 (incidence <1%), elevated LDH and ALP (incidence 1%-5%), fever, headache, malaise,  
428 palpitation, increased uric acid, and elevated CRP (incidence <1%)

### 429 **5.2 Known potential benefits**

430 The role of rhG-CSF in the treatment of Covid-19 remains largely unclear. However,  
431 based on pilot observations, patients might benefit from the treatment because rhG-CSF may  
432 increase the leukocyte and lymphocyte count. The conduct of this trial will derive updated  
433 knowledge that will benefit more patients and better design of future clinical trials to explore  
434 the mode of action of rhG-CSF.

## 435 **6 Management of the study medications**

### 436 **6.1 Storage**

437 Storage: 2°C-10°C, avoid frozen. Designated personnel will be responsible for the acquisition  
438 and dispense of the study medications. The study medications will be dispensed to the study  
439 participants who fulfilled the eligibility criteria.

### 440 **6.2 Preparation**

441 The research nurse will be responsible for the subcutaneous injection of rhG-CSF (5µg/kg) at  
442 day 1, 2 and 3 based on the body weight of the patients

---

### 443 6.3 Dose and usage

444 **Treatment group:** Standard-of-care (SOC) alone or plus rhG-CSF (5 µg/kg subcutaneously  
445 once daily from days 0 to 2)

446 **Control group:** SOC

### 447 6.4 Duration and timing

448 **Treatment group:** Standard-of-care (SOC) alone or plus rhG-CSF (5 µg/kg subcutaneously  
449 once daily for 3 consecutive days)

450 **Control group:** SOC

451 Duration: 14 days

### 452 6.5 Counting of the study medications

453 The investigators designated the staffs to store a sufficient amount of records, including the  
454 date of receipt, batch number, date of expiry, the amount of drug delivery, the date of  
455 dispensation and retrieval. Study medications will be destroyed based on the standardized  
456 procedures. Records of drug destroy will also be made accordingly.

## 457 7 Endpoints and assessment

### 458 7.1 Efficacy

#### 459 Primary endpoint

460 The time to clinical improvement (endorsed by the World Health Organization R&D  
461 Blueprint expert group) within 21 days - the duration from randomization to the improvement  
462 of at least one point on a seven-category ordinal scale or discharge from hospital, whichever  
463 occurs first

#### 464 The 7-category scale

| Score | Criteria                                                                                               |
|-------|--------------------------------------------------------------------------------------------------------|
| 1     | Non-hospitalized with normal activities                                                                |
| 2     | Non-hospitalized but unable to resume normal activities                                                |
| 3     | Hospitalized but not requiring supplemental oxygen                                                     |
| 4     | Hospitalized and requiring supplemental oxygen                                                         |
| 5     | Hospitalized and requiring nasal high-flow oxygen therapy, noninvasive mechanical ventilation, or both |
| 6     | Hospitalized and requiring extracorporeal membrane oxygenation, invasive ventilation, or both          |

|   |       |
|---|-------|
| 7 | Death |
|---|-------|

465

466 **Secondary endpoints**

467 Lymphocyte count at each visit

468 Mortality at day 21

469 The proportion of patients progressing to critical conditions (acute respiratory distress  
470 syndrome, sepsis or septic shock) at day 21

471 Viral loads and detection rate at each visit

472 The duration of oxygen therapy

473

474 **7.2 Efficacy/safety**

475 (1) Vital signs (temperature, heart rate, respiratory rate) and important signs

476 (2) Symptoms and treatment: fever, cough, dyspnea and oxygen saturation

477 (3) Complications (ARDS, septic shock, bacteremia)

478 (4) 7-category scale

479 (5) Chest imaging

480 (6) Laboratory testing

481 ① blood routine test: leukocyte, lymphocyte count

482 ② T lymphocyte subsets and enumeration (CD4+T, CD8+T and NK cell count and  
483 percentage)

484 ③ Oropharyngeal swab SARS-CoV-2 assay for Orf1ab segment (Ct value), with  
485 internal control for RT-PCR

486 ④ Blood gas analysis, PCT, CRP, liver enzymes (AST, ALT and LDH); cardiac  
487 enzymes (CKMB, etc.), renal function (including blood creatinine), other  
488 pathogens

489 (7) Adverse events and serious adverse events

490

---

491 **8 Adverse events**

492 **8.1 Definition**

493 Adverse events are defined as any abrupt medical events after receiving the medical  
494 products or clinical trials, regardless of the causality associated with the treatment.

495 Adverse events could be any adverse or accidental abnormal signs (including laboratory  
496 test abnormalities), symptoms or diseases regardless of the causality associated with the  
497 interventions.

498 **8.2 Range**

499 All suspected adverse drug events include: the adverse reactions associated with drug  
500 overdose, abuse, suspension, allergies, toxicity or beyond all expected reactions; any  
501 irrelevant disease, including exacerbation of the preexisting diseases; accidents or injuries;  
502 laboratory or physical examination abnormalities.

503 **8.3 Observation and documentation of adverse events**

504 The investigators should be responsible for informing the study participants the actual  
505 changes in the clinical conditions before and after the therapeutic interventions. Inductive  
506 queries should be avoided. While monitoring the efficacy, the investigators should closely  
507 monitor the incidence of adverse events and determine the cause and severity and implement  
508 further management, follow up for the clinical prognosis and document the details in the  
509 CRF.

510 **8.4 Severity grading**

511 Mild: Acceptable or causing only slight discomforts, not affecting daily life, not needing  
512 clinical interventions

513 Moderate: Affecting daily life, tolerable, but needing general clinical management

514 Severe: Having objective manifestations, significantly affecting daily life, intolerable,  
515 needing rest at bed, and needing active clinical management

516 **8.5 Causality inference**

517 Based on the five-category criteria, the causality could be classified as ① Definitely  
518 casual; ② Probably causal; ③ Possibly causal; ④ Probably not causal; ⑤ Definitely not  
519 causal. Drug-related adverse events consist of those definitely causal, probably causal and  
520 possibly causal.

521 Causality inference algorithms

---

|           |         |
|-----------|---------|
| Causality | Results |
|-----------|---------|

---

|                       | 1 | 2 | 3 | 4 | 5 |
|-----------------------|---|---|---|---|---|
| Definitely causal     | + | + | — | + | + |
| Probably causal       | + | + | — | + | ? |
| Possibly causal       | + | + | ± | ± | ? |
| Probably not causal   | + | — | ± | ± | ? |
| Definitely not causal | — | — | — | — | — |

522 + Present — Absent ± not readily determined ? unknown

523

## 524 8.6 Time frame

525 The duration of adverse events is defined as the time between signing the informed  
526 consent to the completion of the clinical trial. All adverse events should be documented in the  
527 CRF regardless of the causality with the therapeutic interventions.

## 528 8.7 Serious adverse events

529 Events that meeting any of the following criteria

530 a. Resulting in death;

531 b. life-threatening;

532 c. Persisting or severe disabilities, or permanent loss of capacity;

533 d. Needing hospitalization nor prolonged hospitalization;

534 e. Resulting in congenital malformation

535 OR

536 Any other conditions possibly threatening the life or needing immediate surgeries based  
537 on the medical judgement.

538 All serious adverse events should be reported through telephone or fax to the study  
539 investigators as well as the sponsor, and report to the ethics committee of the participating site  
540 and the lead site, and the provincial and national Food and Drug Administration as well as the  
541 National Health Commission, within 24 hours upon identification.

## 542 8.8 Follow-up

543 All adverse evens should be closely monitored until finally being resolved, or  
544 completion of the final report as of the completion of the whole clinical trial. Follow-up  
545 should not be ceased for serious adverse events despite the completion of the clinical trial.

546

---

547 **9 Data management**

548 **9.1 Entry**

549 (1) Data manager will notify the investigators and request for reply in case issues or  
550 concerns have been raised before data entry. Data response query will be applied for all  
551 queries and responses.

552 (2) The data manager will have to fully understand the contents and coding before data  
553 entry. The process of coding and all contents in the table will be recorded in a designated  
554 coding document. The nomenclature of the database should be standardized, readily reviewed  
555 and readily searched. Accuracy, safety and confidentiality should be ensured.

556 (3) Database: The Epidata software will be adopted.

557 (4) Data entry and management will be processed by designated data managers.

558 (5) The data manager should work with the principal investigators, and determine the  
559 data evaluation and logical audit based on the CRF. The computerized programs will be  
560 drafted. Erroneous data entry will be minimized and the reasons be spotted. All records will  
561 be appropriately documented.

562 **9.2 Data audit and cleaning**

563 (1) The data manager should work with the principal investigators, and determine the  
564 data evaluation and logical audit based on the CRF.

565 (2) The CRF will be stored in order after the data entry and audit is completed.  
566 Catalogue numbers will be filled for further retrieval of the records.

567 (3) The database will be locked after audit and verification of the data. No further  
568 amendment will be allowed once locking has been completed. Issues identified after database  
569 locking will be further amended with the statistical model after further confirmation and  
570 recorded in relevant documents.

571 **9.3 Data audit meeting**

572 The investigators will schedule for data audit meetings based on the actual progress, to  
573 determine the unresolved data query and catalogue the data sets.

574 **9.4 Database locking**

575 The database will be locked once all data queries have been resolved and the database  
576 catalogue has been completed. In principle, no further amendment will be made after

---

577 locking the database. Caution should be exercised should the database be unlocked.  
578 Repeated unlocking should be avoided.

## 579 **9.5 Statistical analysis**

### 580 **Analysis principles**

- 581 • All tests are two-sided, the nominal level of type I error will be 5% and the confidence  
582 level for all confidence intervals (CI) will be 95%.
- 583 • There will be no imputation of the missing values. The number of observations used in  
584 the analysis will be reported.
- 585 • Intention-to-treat principle will be used to deal with the non-compliance.
- 586 • All analysis will be exploratory analysis except for the one for the primary outcome.
- 587 • Subgroup analyses will be carried out irrespective of whether there is a significant  
588 treatment effect on the primary outcome.
- 589 • For the repeatedly measured outcomes, the difference with the baseline data (follow-up  
590 minus the baseline) will be analysed and the baseline data will be included in the model  
591 as covariates.
- 592 • Analyses will be conducted primarily using SAS software (version 9.4, SAS Institute,  
593 Cary, North Carolina, USA). Figures will be plotted using R packages.

### 594 **Patients characteristics and baseline comparisons**

595 Description and statistical inference of the following baseline characteristics will be presented  
596 by treatment group. No statistical inference will be performed for the baseline variables.  
597 Baseline measures for all patients will be tabulated.

### 598 **Primary outcome**

599 For the time to clinical improvement, death events before day 21 will be treated as competing  
600 risk event, and analyses will be performed by using the Gray's test and Fine and Gray  
601 proportion sub-distribution hazards model. The rates of clinical improvement in different  
602 treatment groups will be presented as Kaplan-Meier curves. Gray's test P-value and HR with  
603 a 95% confidence interval estimated by Fine and Gray proportion sub-distribution hazards  
604 model will be reported.

### 605 **Secondary outcomes**

---

606 The post-treatment lymphocyte and viral loads will be presented by using profile plots.  
607 Descriptive analysis and exploratory analysis by using the linear mixed-effect model will be  
608 performed. The post-treatment lymphocyte will be treated as non-normally distributed, and  
609 the median with IQR will be used to present the data at each time point.

610 For the mortality and proportion of patients progressing to critical conditions, the rate  
611 difference with 95% Newcombe-Score CI will be reported. Log-rank test and Cox regression  
612 will be also performed for the time to death and time to progressing to critical conditions.

613 The median hospital stay (days) and oxygen support days with IQR will be reported.

#### 614 **Adverse events**

615 Rates of adverse reactions in different treatment groups will be presented.

#### 616 **Subgroup analysis**

617 Subgroup analyses will be carried out for the primary outcomes.

618 Planned subgroup analysis:

- 619 • Lymphocyte category:  $\leq 400$ ,  $> 400$  cell/ $\mu$ l
- 620 • Oxygen therapy
- 621 • Age category:  $< 65$ ,  $\geq 65$  years
- 622 • Gender: male, female

623

624 **More details see attached SAP.**

625

## 626 **10 Ethics considerations**

627 The Declaration of Helsinki and Good Clinical Practice regulations should be strictly  
628 enforced during the conduct of the trial. Study participants could enter the trial after formally  
629 signing the informed consent forms. Confidentiality should be protected.

### 630 **10.1 Ethics committee**

631 The investigators should ensure that the clinical trial has been reviewed and approved by  
632 the ethics committee which is qualified for the Chinese Good Clinical Practice. Before  
633 initiation of the clinical trial, the investigators should submit the study protocol, informed  
634 consent form and other necessary files to the ethics committee for review. The sponsor



---

635 should inform the ethics committee all serious adverse events that might have  
636 affected the safety of the study participants, took place during further amendment of the  
637 study protocols and during the study. The investigators are responsible for reporting to the  
638 ethics committee the progress related to the clinical trial. The investigators should timely  
639 submit all copies to the ethics committee. The ethics committee should confirm the titles and  
640 the number of the trial protocols upon review and approval for the study protocol, and  
641 document the files and the dates of review and approval.

## 642 **10.2 Informed consent forms**

643 - The investigators should inform the study participants both verbally and literally the  
644 information related to the clinical trial. The study participants and their guardians or  
645 the legitimate representatives (if necessary) have the rights to be informed of further  
646 details of the clinical trial.

647 - The informed consent form (along with the study protocol) should be submitted to the  
648 ethics committee for review and approval. The informed consent form should be  
649 printed in Chinese. If necessary, the investigators should explain to the study  
650 participants in an understandable fashion. The study participants should have a  
651 sufficient amount of time for review before formally signing the informed consent  
652 form.

653 - The informed consent form should be signed by the study participants or their legal  
654 guardians, along with the date of signature. The signing of informed consent form  
655 could be taking place with another individual who witnesses the whole procedures.  
656 Each signed informed consent form should be stored and archived by the investigator  
657 for monitoring, audit and inspection by the sponsor or the national Food and Drug  
658 Administration.

## 659 **10.3 Confidentiality**

660 The investigators are responsible for maintaining the confidentiality of the study  
661 participants. Capital letter, numbers and codes could be adopted for identification of the study  
662 participants. No names could be appearing directly on the CRF. The source document should  
663 be stored, along with the code, names and family address. Strict confidentiality should be  
664 maintained.

---

665 **11 Quality control**

666 **11.1 Standardized operating procedures**

667 All the conduct of the trial should abide by the standardized operating procedures. The  
668 investigators and the sponsors should adhere to the clinical trial protocol to ensure appropriate  
669 control of the quality based on the standardized operating procedures.

670 **11.2 Laboratory quality control**

671 All central laboratories should establish the standardized procedures and quality control  
672 program for the tests.

673 **11.3 Clinical audit**

674 The principal investigators could authorize the audit managers to perform data audit  
675 based on the requirement of the Good Clinical Practice and the study protocol.

676 **11.4 Investigation**

677 The principal investigators will be responsible for the investigation of the conduct of the  
678 study.

679 **12 Organization and implementation**

680 It is planned that the first patient will be enrolled on 2019.2.3 and the last patient will  
681 complete the trial at day 21 after the treatment.

682 **13 Participating investigators**

683 Guangzhou No.8 People's Hospital Lin-ling Cheng, Chun-liang Lei

684 Wuhan Union Hospital Nuo-fu Zhang, Yu Hu

685 Wuhan Hankou Hospital Ai-lan Chen

686

687 **14 Reference**

- 688 1. World Health Organization. <https://covid19.who.int/>  
689 2. Shen C, Wang Z, Zhao F, et al. Treatment of 5 Critically Ill Patients With COVID-19 With  
690 Convalescent Plasma. *JAMA*. 2020:e204783  
691 3. Huang C, Wang Y, Li X, et al. Clinical features of patients with 2019 novel coronavirus in  
692 Wuhan, China. *Lancet*. 2020; doi: 10.1016/S0140-6736(20)30183-5  
693 4. Guan WJ, Ni ZY, Hu Y, et al. Clinical Characteristics of Coronavirus Disease 2019 in  
694 China. *N Engl J Med*. 2020 Feb 28. doi: 10.1056/NEJMoa2002032

- 
- 695 5. Chen N, Zhou M, Dong X, et al. Epidemiological and clinical characteristics of  
696 99 cases of 2019 novel coronavirus pneumonia in Wuhan, China: a descriptive study.  
697 *Lancet*. 2020;395:507-513
- 698 6. Yang X, Yu Y, Xu J, et al. Clinical course and outcomes of critically ill patients with  
699 SARS-CoV-2 pneumonia in Wuhan, China: a single-centered, retrospective, observational  
700 study. *Lancet Respir Med*. 2020 Feb 24. pii: S2213-2600(20)30079-5
- 701 7. Zhou F, Yu T, Du R, et al. Clinical course and risk factors for mortality of adult inpatients  
702 with COVID-19 in Wuhan, China: a retrospective cohort study. *Lancet*. 2020;395:1054-1062
- 703 8. Tan L, Wang Q, Zhang D, et al. Lymphopenia predicts disease severity of COVID-19: a  
704 descriptive and predictive study. *Signal Transduct Target Ther*. 2020;5:33
- 705 9. Zhao H, Guo M, Sun X, et al. Effects of Recombinant Human Granulocyte  
706 Colony-Stimulating Factor on Central and Peripheral T Lymphocyte Reconstitution After  
707 Sublethal Irradiation in Mice. *J Radiat Res*. 2013;54:83-91
- 708 10. Ang CC, Tay YK. Hematological Abnormalities and the Use of  
709 Granulocyte-Colony-Stimulating Factor in Patients With Stevens-Johnson Syndrome and  
710 Toxic Epidermal Necrolysis. *Int J Dermatol*. 2011;50:1570-8
- 711 11. Li JG, Zhang YJ, Wu W, et al. Effect of recombinant human granulocyte  
712 colony-stimulating factor on leukopenia in severe acute respiratory syndrome patients. *Yi Shi*  
713 *Jin Xiu Za Zhi*. 2004; 27:21-22
- 714 12. Kimura S, Matsuda J, Ikematsu S, et al. Efficacy of recombinant human granulocyte  
715 colony stimulating factor on neutropenia in patients with AIDS. *AIDS*. 1990; 4:1251-1255
- 716 13. Coronavirus disease (COVID-2019) R&D. Geneva: World Health Organization  
717 (<http://www.who.int/blueprint/priority-diseases/key-action/novel-coronavirus/en/>).
- 718 14. International Severe Acute Respiratory and Emerging Infections Consortium (ISARIC)  
719 home page (<https://isaric.tghn.org/>).
- 720 15. Xu Z, Shi L, Wang Y, et al. Pathological findings of COVID-19 associated with acute  
721 respiratory distress syndrome. *Lancet Respir Med*. 2020;8:420-422
- 722 16. Wang D, Hu B, Hu C, et al. Clinical Characteristics of 138 Hospitalized Patients With  
723 2019 Novel Coronavirus-Infected Pneumonia in Wuhan, China. *JAMA*. 2020 February  
724 7.(Published online)
- 725 17. Fung SY, et al. A tug-of-war between severe acute respiratory syndrome coronavirus 2  
726 and host antiviral defence: lessons from other pathogenic viruses. *Emerg Microbes Infect*.  
727 2020; 9(1): 558-570.
- 728 18. Suxin Wan, et al. Characteristics of lymphocyte subsets and cytokines in peripheral blood  
729 of 123 hospitalized patients with 2019 novel coronavirus pneumonia (NCP). medRxiv. 2020,  
730 online.
- 731 19. Jin YH, Cai L, Cheng ZS, Cheng H, et al. A rapid advice guideline for the diagnosis and  
732 treatment of 2019 novel coronavirus (2019-nCoV) infected pneumonia (standard version). *Mil*  
733 *Med Res*. 2020;7(1):4. doi: 10.1186/s40779-020-0233-6.
- 734 20. Yang M, Hon KL, Li K, et al. The Effect of SARS Coronavirus on Blood System: Its  
735 Clinical Findings and the Pathophysiologic Hypothesis. *Zhong guo Shi Yan Xue Ye Xue Za*  
736 *Zhi*. 2003;11(3):217-21.
- 737 21. Frieman M, Heise M, Baric R. SARS coronavirus and innate immunity. *Virus Res*.  
738 2008;133(1):101-112.

---

739

740

741
