# Supplementary material
Source: PubMed Central journal article supplement (PMC7489414)
Supplement: jamainternmed-e205503-s003.pdf [file jamainternmed-e205503-s003.pdf]

1 **Multicenter randomized controlled trial for rhG-GSF in the**  
2 **treatment of novel coronavirus pneumonia (COVID-19)**

3

4 **(COVID-19 study)**

5

6 **STATISTICAL ANALYSIS PLAN**

7 Version 1.0 (Apr. 01, 2020)

8

9

10 Authors: COVID-19 Study Group

11

12

13 **Author for correspondence:**

14 Chongyang Duan and Pingyan Chen

15 Department of Biostatistics, Southern Medical University,

16 510515, Guangzhou, China

17 Email: chenpy99@126.com

18

19

|    |                                                                    |           |
|----|--------------------------------------------------------------------|-----------|
| 20 | <b>Contents</b>                                                    |           |
| 21 | <b>Primary Rationale for Amendment:</b> .....                      | <b>4</b>  |
| 22 | <b>List of abbreviations and definition of terms</b> .....         | <b>5</b>  |
| 23 | <b>Abstract</b> .....                                              | <b>6</b>  |
| 24 | <b>1. Introduction</b> .....                                       | <b>7</b>  |
| 25 | <b>2. Study design</b> .....                                       | <b>7</b>  |
| 26 | <b>2.1 Overview</b> .....                                          | <b>7</b>  |
| 27 | <b>2.2 Sample size estimation</b> .....                            | <b>7</b>  |
| 28 | <b>2.3 Definitions of the outcomes</b> .....                       | <b>7</b>  |
| 29 | 2.3.1 <i>Primary outcome</i> .....                                 | <b>7</b>  |
| 30 | 2.3.2 <i>Secondary outcomes</i> .....                              | <b>8</b>  |
| 31 | 2.3.3 <i>Safety outcomes</i> .....                                 | <b>8</b>  |
| 32 | <b>3. Statistical analysis</b> .....                               | <b>8</b>  |
| 33 | <b>3.1 Analysis principles</b> .....                               | <b>8</b>  |
| 34 | <b>3.2 Data quality control</b> .....                              | <b>9</b>  |
| 35 | <b>3.3 Trial profile</b> .....                                     | <b>9</b>  |
| 36 | <b>3.4 Patients characteristics and baseline comparisons</b> ..... | <b>9</b>  |
| 37 | <b>3.5 Primary outcome</b> .....                                   | <b>9</b>  |
| 38 | <b>3.6 Secondary outcomes</b> .....                                | <b>10</b> |
| 39 | <b>3.7 Adverse events</b> .....                                    | <b>10</b> |
| 40 | <b>3.8 Other variables</b> .....                                   | <b>10</b> |

|    |                                                                                               |           |
|----|-----------------------------------------------------------------------------------------------|-----------|
| 41 | <b>3.9 Patients drop out or switch between groups .....</b>                                   | <b>10</b> |
| 42 | <b>3.10 Subgroup analysis.....</b>                                                            | <b>10</b> |
| 43 | <b>3.11 Sensitivity analysis .....</b>                                                        | <b>11</b> |
| 44 | <b>3.12 Tables and figures for the main paper.....</b>                                        | <b>11</b> |
| 45 | <b>4. References .....</b>                                                                    | <b>12</b> |
| 46 | <b>Appendix 1: Proposed format of data tables in the publication of the main results.....</b> | <b>13</b> |
| 47 | <b>Table 1: Baseline characteristics of the study participants .....</b>                      | <b>13</b> |
| 48 | <b>Table 2: Results primary and secondary outcomes .....</b>                                  | <b>16</b> |
| 49 | <b>Table 3: Comparison of adverse reactions.....</b>                                          | <b>17</b> |
| 50 | <b>Appendix 2: Figures for the main results paper.....</b>                                    | <b>18</b> |
| 51 | <b>Figure 1: Flowchart of inclusion and follow-up .....</b>                                   | <b>18</b> |
| 52 | <b>Figure 2: KM plots of time to clinical improvement.....</b>                                | <b>18</b> |
| 53 | <b>Figure 3: Changes in lymphocyte and viral loads during the follow-up period.....</b>       | <b>18</b> |
| 54 | <b>Figure 4: Forest plot of subgroups (sample plot) .....</b>                                 | <b>18</b> |
| 55 | <b>Appendix 3: Statement of contribution of the authors .....</b>                             | <b>19</b> |
| 56 |                                                                                               |           |
| 57 |                                                                                               |           |

58

59 **Primary Rationale for Amendment:**

60 There was no amendment for the statistical analysis plan in this study.

61

62

63

64 **List of abbreviations and definition of terms**

|         |                                                         |
|---------|---------------------------------------------------------|
| CI      | Confidence interval                                     |
| HR      | Hazard ratio                                            |
| IQR     | Interquartile range                                     |
| rhG-CSF | recombinant human granulocyte colony stimulating factor |
| SD      | Standard deviation                                      |
| SOC     | Standard of care                                        |

65

66

67 **Abstract**

68 **Background:** Several latest reports have documented lymphopenia in more than 80% of  
69 patients with Covid-19 upon hospital admission. The recombinant human granulocyte colony  
70 stimulating factor (rhG-CSF) is a biologic capable of increasing peripheral blood leukocyte  
71 and lymphocyte count in both mice models and human. Our pilot observation showed rhG-  
72 CSF could be indicated for those Covid-19 patients with lymphopenia.

73 **Objective:** We aimed to examine the efficacy and safety of rhG-CSF in patients with Covid-  
74 19 who had lymphopenia.

75 **Methods:** All data collected by participating researchers will be reviewed and formally  
76 assessed. Information pertaining to the baseline characteristics of patients will be selected and  
77 for each item statistically relevant descriptive elements are described. Information relevant to  
78 the rhG-CSF and standard-of-care (SOC) group is classified and, for each item, descriptive  
79 statistical analyses are planned for comparison between the rhG-CSF and SOC groups.  
80 Finally, for the outcomes which are classified as primary and secondary, the most appropriate  
81 statistical comparison to be made between groups are described.

82 **Results:** A statistical analysis plan (SAP) has been developed for the results of our study.  
83 This plan will allow a comprehensive description of baseline characteristics, features of the  
84 treatments, along with pre-determined statistical assessment of relevant outcome in a way that  
85 is transparent, available to the public, verifiable and pre-determined before completion of data  
86 collection.

87 **Conclusions:** We have developed a pre-determined SAP for the study which is to be  
88 followed to avoid analysis bias arising from prior knowledge of the study findings.

89 **Trial registration:** Chinese Clinical Trial Registry (No.: ChiCTR2000030007)

90

91 **1. Introduction**

---

92 Since December 2019, coronavirus disease 2019 (Covid-19) has resulted in a global outbreak.  
93 Several latest reports have documented lymphopenia in more than 80% of patients with  
94 Covid-19 upon hospital admission. The recombinant human granulocyte colony stimulating  
95 factor (rhG-CSF) is a biologic capable of increasing peripheral blood leukocyte and  
96 lymphocyte count in both mice models and human. Our pilot observation showed that rhG-  
97 CSF could be indicated for those Covid-19 patients with lymphopenia.

98 **2. Study design**

---

99 **2.1 Overview**

100 The study is a prospective, multicenter, randomized, open-label, standard-of-care control  
101 clinical trial.

102 The primary aim of this study is to evaluate the efficacy of rhG-CSF for Covid-19 patients  
103 with lymphopenia compared with standard-of-care (SOC).

104 The null hypothesis is that there is no difference in the time to clinical improvement.

105 **2.2 Sample size estimation**

106 The sample size estimation is based on the time to clinical improvement within 21 days.  
107 There is no prior literature report which would provide the basis for sample size estimation.  
108 Assuming the median duration of the SOC group of 14 days, 192 patients (96 per group) with  
109 134 events would be needed to provide a power of 90% to detect a 6-day difference in the  
110 median time to clinical improvement under a two-sided significance level of  $\alpha=0.05$ .  
111 Considering a low rate of drop-out, 200 patients (100 per group) were planned to be enrolled.

112 **2.3 Definitions of the outcomes**

113 *2.3.1 Primary outcome*

114 The primary outcome used for evaluating the efficacy is the time to clinical improvement  
115 which defined as the duration from randomization to the improvement of at least one point on  
116 a seven-category ordinal scale.

117

118

119 2.3.2 *Secondary outcomes*

120 Secondary outcomes will include the following:

- 121 post-treatment lymphocyte count;
- 122 mortality;
- 123 proportions of patients critical conditions;
- 124 viral loads;
- 125 Hospital stay days;
- 126 Oxygen support days.

127 2.3.3 *Safety outcomes*

128 Safety outcomes will include the following:

- 129 adverse events;
- 130 serious adverse events;
- 131 premature discontinuation of treatment.

132

133 **3. Statistical analysis**

---

134 **3.1 Analysis principles**

- 135 • All tests are two-sided, the nominal level of type I error will be 5% and the confidence  
136 level for all confidence intervals (CI) will be 95%.
- 137 • There will be no imputation of the missing values. The number of observations used in  
138 the analysis will be reported.
- 139 • Intention-to-treat principle will be used to deal with the non-compliance.
- 140 • All analysis will be exploratory analysis except for the one for the primary outcome.
- 141 • Subgroup analyses will be carried out irrespective of whether there is a significant  
142 treatment effect on the primary outcome.
- 143 • For the repeatedly measured outcomes, the difference with the baseline data (follow-up  
144 minus the baseline) will be analyzed and the baseline data will be included in the model  
145 as covariables.



146 • Analyses will be conducted primarily using SAS software (version 9.4, SAS Institute,  
147 Cary, North Carolina, USA). Figures will be plotted using R packages.

### 148 **3.2 Data quality control**

149 All responsible data collectors will be trained at the beginning of this study. Double entry is  
150 required for all variables and double validation is required for all other variables. The hospital  
151 coordinator at each collaborating site ensures that all data needed are collected.

### 152 **3.3 Trial profile**

153 The flow chart of inclusion and follow-up is displayed in a diagram (Appendix 2; Figure 1).  
154 The report will include the number of patients who met the inclusion criteria and the number  
155 included and reasons for exclusion of the non-included patients.

### 156 **3.4 Patients characteristics and baseline comparisons**

157 Description and statistical inference of the following baseline characteristics will be presented  
158 by treatment group.

159 Discrete variables will be summarised by frequencies and percentages. Percentages will be  
160 calculated according to the number of patients for whom the data are available. The number  
161 of missing values will be added in a footnote in the corresponding summary table.

162 Continuous variables will be summarised by the use of standard measures of central  
163 tendency and dispersion, either mean and standard deviation [Mean  $\pm$  SD] for variables  
164 identified with #, or median and 25%, 75% quartiles[Median(IQR)] with †.

165 No statistical inference will be performed for the baseline variables.

166 Baseline measures for all patients will be tabulated.

### 167 **3.5 Primary outcome**

168 For the time to clinical improvement, death events before day 21 will be treated as the  
169 competing risk event, and analyses will be performed by using the Gray's test and Fine and  
170 Gray proportion sub-distribution hazards model. The rates of clinical improvement in  
171 different treatment groups will be presented as Kaplan-Meier curves. Gray's test P-value and  
172 HR with a 95% confidence interval estimated by Fine and Gray proportion sub-distribution  
173 hazards model will be reported.

174 **3.6 Secondary outcomes**

175 The post-treatment lymphocyte and viral loads will be presented by using profile plots.  
176 Descriptive analysis and exploratory analysis by using the linear mixed-effect model will be  
177 performed. The post-treatment lymphocyte will be treated as non-normally distributed, and  
178 the median with IQR will be used to present the data at each time point.

179 For the mortality and proportion of patients progressing to critical conditions, the data will  
180 be summarised by frequencies and percentages, and rate difference with 95% Newcombe-  
181 Score CI will be reported. Log-rank test and Cox regression will be also performed for the  
182 time to death and time to progressing to critical conditions.

183 The median hospital stay (days) and oxygen support days with IQR will be reported.

184 The Hodges-Lehmann estimate of the location shift with a 95% asymptotic confidence  
185 interval will be reported for the comparison of medians.

186 **3.7 Adverse events**

187 Rates of adverse reactions in different treatment groups will be presented.

188 **3.8 Other variables**

189 In our trial, we will also collect the data of physical examination, clinical symptoms, PSI  
190 scores, and other laboratory tests. Statistical analysis methods will be used appropriately for  
191 those variables.

192 **3.9 Patients drop out or switch between groups**

193 During the study, patients may switch between the two groups. The intention-to-treat  
194 principle will be used to deal with patients who had switched to the other group. Sensitivity  
195 analyses will be used to assess the robustness of the results among the patients who had  
196 switched to the other group.

197 The intention-to-treat principle will be also used to deal with the patients who dropped out.

198 **3.10 Subgroup analysis**

199 Subgroup analyses will be carried out for the primary outcomes.

200 Planned subgroup analysis:

- 201 • Lymphocyte category:  $\leq 400$ ,  $> 400$  cell/ $\mu$ l
- 202 • Oxygen therapy

203 • Age category: <65, ≥65 years

204 • Gender: male, female

205 • Baseline clinical grade

206 Forest plots will be constructed to illustrate subgroup analyses.

### 207 **3.11 Sensitivity analysis**

208 Planned sensitivity analysis:

209 • sensitivity for the patients who had switched to the other group

### 210 **3.12 Tables and figures for the main paper**

211 The proposed tables and figures for the main results are presented in Appendix 1 and 2.

212 Table 1 will report the key baseline characteristics of the participants by treatment group.

213 Table 2 will report the primary and secondary outcomes.

214 Table 3 will report the incidence of adverse reactions.

215 In addition, the following figures will be prepared:

216 • A diagram illustrating the flow chart of inclusion and follow-up (Appendix 2; Figure 1).

217 • Kaplan-Meier plot of time to clinical improvement (Appendix 2, Figure 2).

218 • A Forest plot of the treatment effect among different subgroups (Appendix 2, Figure 3).

219 • A profile plot of the changes in lymphocyte and viral loads during the 21 days follow-  
220 up period among different groups (Appendix 2, Figure 4).

221 A more extensive list of tables and figures used to report additional information is  
222 available upon request.

223 **4. References**

---

- 224 1. World Health Organization. <https://covid19.who.int/>
- 225 2. Guan WJ, Ni ZY, Hu Y, et al. Clinical Characteristics of Coronavirus Disease 2019 in  
226 China. *N Engl J Med*. 2020 Feb 28. doi: 10.1056/NEJMoa2002032.
- 227 3. Zhao H, Guo M, Sun X, et al. Effects of Recombinant Human Granulocyte Colony-  
228 Stimulating Factor on Central and Peripheral T Lymphocyte Reconstitution After Sublethal  
229 Irradiation in Mice. *J Radiat Res*. 2013;54:83-91
- 230 4. Ang CC, Tay YK. Hematological Abnormalities and the Use of Granulocyte-Colony-  
231 Stimulating Factor in Patients With Stevens-Johnson Syndrome and Toxic Epidermal  
232 Necrolysis. *Int J Dermatol*. 2011;50:1570-8

233

234

235 **Appendix 1: Proposed format of data tables in the publication of the main**  
 236 **results**

237 **Table 1: Baseline characteristics of the study participants**

|                                                             | <b>rhG-CSF</b>     | <b>Standard-of-care</b> |
|-------------------------------------------------------------|--------------------|-------------------------|
|                                                             | <b>(n = XXX)</b>   | <b>(n = XXX)</b>        |
| Age, y <sup>#</sup>                                         | XX.XX±XX.XX        | XX.XX±XX.XX             |
| Male                                                        | XXX(XX.X%)         | XXX(XX.X%)              |
| Body temperature, °C <sup>#</sup>                           | XX.XX±XX.XX        | XX.XX±XX.XX             |
| Fever on admission <sup>#</sup>                             | XXX(XX.X%)         | XXX(XX.X%)              |
| Respiratory rate, .min <sup>#</sup>                         | XX.XX±XX.XX        | XX.XX±XX.XX             |
| PaO <sub>2</sub> :FiO <sub>2</sub> ratio, mmHg <sup>†</sup> | XX.XX(XX.XX~XX.XX) | XX.XX(XX.XX~XX.XX)      |
| Blood pressure, mmHg <sup>#</sup>                           |                    |                         |
| Systolic                                                    | XX.XX±XX.XX        | XX.XX±XX.XX             |
| Diastolic                                                   | XX.XX±XX.XX        | XX.XX±XX.XX             |
| Lymphocyte count, per mm <sup>3</sup> †                     | XX.XX(XX.XX~XX.XX) | XX.XX(XX.XX~XX.XX)      |
| White-cell count, per mm <sup>3</sup> †                     | XX.XX(XX.XX~XX.XX) | XX.XX(XX.XX~XX.XX)      |
| Platelet count, per mm <sup>3</sup> †                       | XX.XX(XX.XX~XX.XX) | XX.XX(XX.XX~XX.XX)      |
| C-reactive protein, mg/liter†                               | XX.XX(XX.XX~XX.XX) | XX.XX(XX.XX~XX.XX)      |
| Procalcitonin, ng/ml†                                       | XX.XX(XX.XX~XX.XX) | XX.XX(XX.XX~XX.XX)      |
| Aspartate aminotransferase, U/liter†                        | XX.XX(XX.XX~XX.XX) | XX.XX(XX.XX~XX.XX)      |
| Alanine aminotransferase, U/liter†                          | XX.XX(XX.XX~XX.XX) | XX.XX(XX.XX~XX.XX)      |
| Lactate dehydrogenase, U/liter†                             | XX.XX(XX.XX~XX.XX) | XX.XX(XX.XX~XX.XX)      |
| Creatine kinase, U/liter†                                   | XX.XX(XX.XX~XX.XX) | XX.XX(XX.XX~XX.XX)      |
| <b>Medical history</b>                                      |                    |                         |

|                                     | <b>rhG-CSF</b>     | <b>Standard-of-care</b> |
|-------------------------------------|--------------------|-------------------------|
|                                     | <b>(n = XXX)</b>   | <b>(n = XXX)</b>        |
| Shortness of breath                 | XXX(XX.X%)         | XXX(XX.X%)              |
| Cyanosis                            | XXX(XX.X%)         | XXX(XX.X%)              |
| Fatigue                             | XXX(XX.X%)         | XXX(XX.X%)              |
| Hemoptysis                          | XXX(XX.X%)         | XXX(XX.X%)              |
| <b>Seven-category scale</b>         |                    |                         |
| Grade 3                             | XXX(XX.X%)         | XXX(XX.X%)              |
| Grade 4                             | XXX(XX.X%)         | XXX(XX.X%)              |
| Grade 5                             | XXX(XX.X%)         | XXX(XX.X%)              |
| .....                               | XXX(XX.X%)         | XXX(XX.X%)              |
| <b>Viral load</b>                   |                    |                         |
| ORF1ab†                             | XX.XX(XX.XX~XX.XX) | XX.XX(XX.XX~XX.XX)      |
| N†                                  | XX.XX(XX.XX~XX.XX) | XX.XX(XX.XX~XX.XX)      |
| <b>Medication</b>                   |                    |                         |
| Interferon $\alpha$                 | XXX(XX.X%)         | XXX(XX.X%)              |
| Lopinavir–ritonavir                 | XXX(XX.X%)         | XXX(XX.X%)              |
| Arbidol                             | XXX(XX.X%)         | XXX(XX.X%)              |
| <b>Treatment</b>                    |                    |                         |
| Non-invasive mechanical ventilation | XXX(XX.X%)         | XXX(XX.X%)              |
| Invasive mechanical ventilation     | XXX(XX.X%)         | XXX(XX.X%)              |
| Extracorporeal membrane oxygenation | XXX(XX.X%)         | XXX(XX.X%)              |
| Glucocorticoid therapy              | XXX(XX.X%)         | XXX(XX.X%)              |
| Others                              | XXX(XX.X%)         | XXX(XX.X%)              |

|                                     | <b>rhG-CSF</b>     | <b>Standard-of-care</b> |
|-------------------------------------|--------------------|-------------------------|
|                                     | <b>(n = XXX)</b>   | <b>(n = XXX)</b>        |
| Duration of glucocorticoid therapy† | XX.XX(XX.XX~XX.XX) | XX.XX(XX.XX~XX.XX)      |

238 No of Missing: XXX of XXX.

239

240 **Table 2: Results primary and secondary outcomes**

| <b>Outcomes</b>                                   | <b>rhG-CSF<br/>(n = XXX)</b> | <b>Standard-of-care<br/>(n = XXX)</b> | <b>Difference<br/>(95% CI)</b> |
|---------------------------------------------------|------------------------------|---------------------------------------|--------------------------------|
| Time to clinical improvement                      | XX.XX(XX.X~XX.X)             | XX.X(XX.X~XX.X)                       | X.X(X.X~X.X)                   |
| Day 21 clinical improvement                       | XXX(XX.X%)                   | XXX(XX.X%)                            | X.X(X.X~X.X)                   |
| Time to Death                                     | XX.XX(XX.X~XX.X)             | XX.X(XX.X~XX.X)                       | X.X(X.X~X.X)                   |
| Day 21 mortality                                  | XXX(XX.X%)                   | XXX(XX.X%)                            | X.X(X.X~X.X)                   |
| Time to progressing to critical condition         | XX.XX(XX.X~XX.X)             | XX.X(XX.X~XX.X)                       | X.X(X.X~X.X)                   |
| Day 21 patients progressing to critical condition | XXX(XX.X%)                   | XXX(XX.X%)                            | X.X(X.X~X.X)                   |
| Oxygen support days                               | XX.XX(XX.X~XX.X)             | XX.X(XX.X~XX.X)                       | X.X(X.X~X.X)                   |
| Hospital stay days                                | XX.XX(XX.X~XX.X)             | XX.X(XX.X~XX.X)                       | X.X(X.X~X.X)                   |
| Seven-category scale at day 7                     |                              |                                       |                                |
| Grade 2                                           | XXX(XX.X%)                   | XXX(XX.X%)                            |                                |
| Grade 3                                           | XXX(XX.X%)                   | XXX(XX.X%)                            |                                |
| .....                                             | XXX(XX.X%)                   | XXX(XX.X%)                            |                                |
| Seven-category scale at day 14                    |                              |                                       |                                |
| Grade 2                                           | XXX(XX.X%)                   | XXX(XX.X%)                            |                                |
| Grade 3                                           | XXX(XX.X%)                   | XXX(XX.X%)                            |                                |
| .....                                             | XXX(XX.X%)                   | XXX(XX.X%)                            |                                |
| Viral load at day 7                               |                              |                                       |                                |
| ORF1ab                                            | XX.XX(XX.X~XX.X)             | XX.X(XX.X~XX.X)                       | X.X(X.X~X.X)                   |
| N                                                 | XX.XX(XX.X~XX.X)             | XX.X(XX.X~XX.X)                       | X.X(X.X~X.X)                   |
| Viral load at day 14                              |                              |                                       |                                |
| ORF1ab                                            | XX.XX(XX.X~XX.X)             | XX.X(XX.X~XX.X)                       | X.X(X.X~X.X)                   |
| N                                                 | XX.XX(XX.X~XX.X)             | XX.X(XX.X~XX.X)                       | X.X(X.X~X.X)                   |

241

242

243

244

245

246

247

248



249 **Table 3: Comparison of adverse reactions**

| Adverse event                          | rhG-CSF<br>(n = XXX) |              | Standard-of-care<br>(n = XXX) |              |
|----------------------------------------|----------------------|--------------|-------------------------------|--------------|
|                                        | Any Grade            | Grade 3 or 4 | Any Grade                     | Grade 3 or 4 |
| <b>Any adverse event</b>               |                      |              |                               |              |
| Over all                               | XXX(XX.X%)           | XXX(XX.X%)   | XXX(XX.X%)                    | XXX(XX.X%)   |
| Neutrophilia                           | XXX(XX.X%)           | XXX(XX.X%)   | XXX(XX.X%)                    | XXX(XX.X%)   |
| Osteodynia                             | XXX(XX.X%)           | XXX(XX.X%)   | XXX(XX.X%)                    | XXX(XX.X%)   |
| Muscular soreness                      | XXX(XX.X%)           | XXX(XX.X%)   | XXX(XX.X%)                    | XXX(XX.X%)   |
| Rash                                   | XXX(XX.X%)           | XXX(XX.X%)   | XXX(XX.X%)                    | XXX(XX.X%)   |
| Fatigue                                | XXX(XX.X%)           | XXX(XX.X%)   | XXX(XX.X%)                    | XXX(XX.X%)   |
| Nausea                                 | XXX(XX.X%)           | XXX(XX.X%)   | XXX(XX.X%)                    | XXX(XX.X%)   |
| Vomiting                               | XXX(XX.X%)           | XXX(XX.X%)   | XXX(XX.X%)                    | XXX(XX.X%)   |
| Facial flushing                        | XXX(XX.X%)           | XXX(XX.X%)   | XXX(XX.X%)                    | XXX(XX.X%)   |
| Tachycardia                            | XXX(XX.X%)           | XXX(XX.X%)   | XXX(XX.X%)                    | XXX(XX.X%)   |
| Increased lactate dehydrogenase        | XXX(XX.X%)           | XXX(XX.X%)   | XXX(XX.X%)                    | XXX(XX.X%)   |
| Increased alkaline phosphatase         | XXX(XX.X%)           | XXX(XX.X%)   | XXX(XX.X%)                    | XXX(XX.X%)   |
| Increased aspartate aminotransferase   | XXX(XX.X%)           | XXX(XX.X%)   | XXX(XX.X%)                    | XXX(XX.X%)   |
| Increased alanine transaminase         | XXX(XX.X%)           | XXX(XX.X%)   | XXX(XX.X%)                    | XXX(XX.X%)   |
| Increased creatinine                   | XXX(XX.X%)           | XXX(XX.X%)   | XXX(XX.X%)                    | XXX(XX.X%)   |
| <b>Serious adverse event</b>           |                      |              |                               |              |
| Over all                               | XXX(XX.X%)           | XXX(XX.X%)   | XXX(XX.X%)                    | XXX(XX.X%)   |
| Sepsis or septic shock                 | XXX(XX.X%)           | XXX(XX.X%)   | XXX(XX.X%)                    | XXX(XX.X%)   |
| Respiratory failure                    | XXX(XX.X%)           | XXX(XX.X%)   | XXX(XX.X%)                    | XXX(XX.X%)   |
| Acute respiratory distress syndrome    | XXX(XX.X%)           | XXX(XX.X%)   | XXX(XX.X%)                    | XXX(XX.X%)   |
| Acute kidney injury                    | XXX(XX.X%)           | XXX(XX.X%)   | XXX(XX.X%)                    | XXX(XX.X%)   |
| Pneumothorax                           | XXX(XX.X%)           | XXX(XX.X%)   | XXX(XX.X%)                    | XXX(XX.X%)   |
| Disseminated intravascular coagulation | XXX(XX.X%)           | XXX(XX.X%)   | XXX(XX.X%)                    | XXX(XX.X%)   |
| Acute heart failure                    | XXX(XX.X%)           | XXX(XX.X%)   | XXX(XX.X%)                    | XXX(XX.X%)   |

250

251

252

253 **Appendix 2: Figures for the main results paper**

254 **Figure 1: Flowchart of inclusion and follow-up**

255 **Figure 2: KM plots of time to clinical improvement**

256 **Figure 3: Changes in lymphocyte and viral loads during the follow-up period**

257 **Figure 4: Forest plot of subgroups (sample plot)**

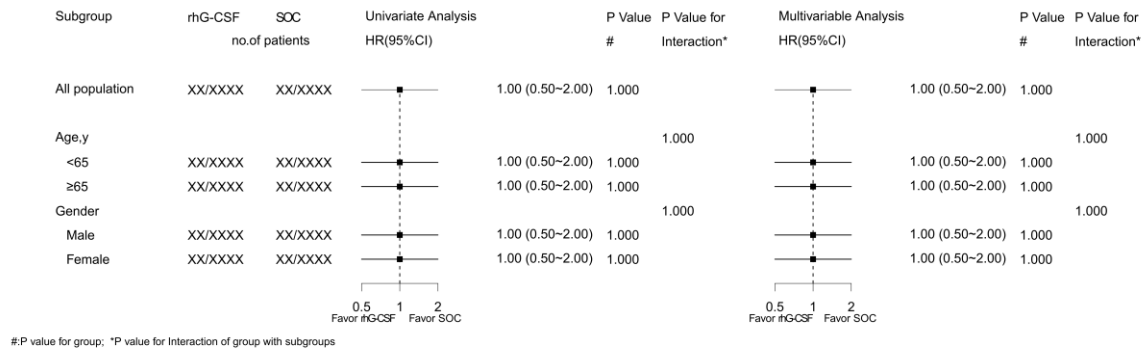

258

259

260

261 **Appendix 3: Statement of contribution of the authors**

262 Chongyang Duan and Pingyan Chen participated in writing the first draft and all revisions of the  
263 SAP. All the members of this study participated in critical reviews of the SAP. The SAP was  
264 prepared without knowledge of the data.
