# Supplementary material
Source: PubMed Central journal article supplement (PMC7489414)
Supplement: jamainternmed-e205503-s004.pdf [file jamainternmed-e205503-s004.pdf]

## Data Sharing Statement

Cheng. Effect of Recombinant Human Granulocyte Colony-Stimulating Factor for Patients With Coronavirus Disease 2019 (COVID-19) and Lymphopenia. *JAMA Intern Med*. Published September 10, 2020. 10.1001/jamainternmed.2020.5503

### Data

**Data available:** Yes

**Data types:** Deidentified participant data

**How to access data:** all requests should be addressed to the corresponding author

**When available:** With publication

### Supporting Documents

**Document types:** Other (please specify)

**Additional Information:** statistical analytical plan

**How to access documents:** we will be happy to share with the Journal and post online upon publication

**When available:** With publication

### Additional Information

**Who can access the data:** the corresponding author

**Types of analyses:** for research only

**Mechanisms of data availability:** we will be happy to share with the Journal and post online upon publication; with signed agreement

**Any additional restrictions:** as indicated above
